# Supplementary material for: Sustainable hybrid energy harvester based on air stable quantum dot solar cells and triboelectric nanogenerator
Source: Royal Society of Chemistry journal article supplement (doi:10.1039/c8ta03870h), 2018-01-01
Supplement: c8ta03870h4.pdf [file c8ta03870h4.pdf]

## Supplementary Information

### Sustainable Hybrid Energy Harvester based on Air Stable Quantum Dot Solar Cells and Triboelectric Nanogenerator

Yuljae Cho,<sup>a,†</sup> Sanghyo Lee,<sup>a,†</sup> John Hong,<sup>a</sup> Sangyeon Pak,<sup>a</sup> Bo Hou,<sup>a</sup> Young-Woo Lee,<sup>b</sup> Jae Eun Jang,<sup>c</sup>  
Hyunsik Im,<sup>d</sup> Jung Inn Sohn,<sup>a,d,\*</sup> SeungNam Cha,<sup>a,\*</sup> Jong Min Kim<sup>e</sup>

<sup>a</sup>*Department of Engineering Science, University of Oxford, Parks Road, Oxford OX1 3PJ, United Kingdom*

<sup>b</sup>*Department of Energy Systems, Soonchunhyang University, Asan, Chungcheongnamdo, 31538, Republic of Korea*

<sup>c</sup>*Department of Information and Communication Engineering, Daegu Gyeongbuk Institute of Science and Technology, Daegu, Republic of Korea*

<sup>d</sup>*Division of Physics and Semiconductor Science, Dongguk University, Seoul 100-715, Republic of Korea*

<sup>e</sup>*Department of Engineering, University of Cambridge, 9 JJ Thomson Avenue, Cambridge CB3 0FA, United Kingdom*

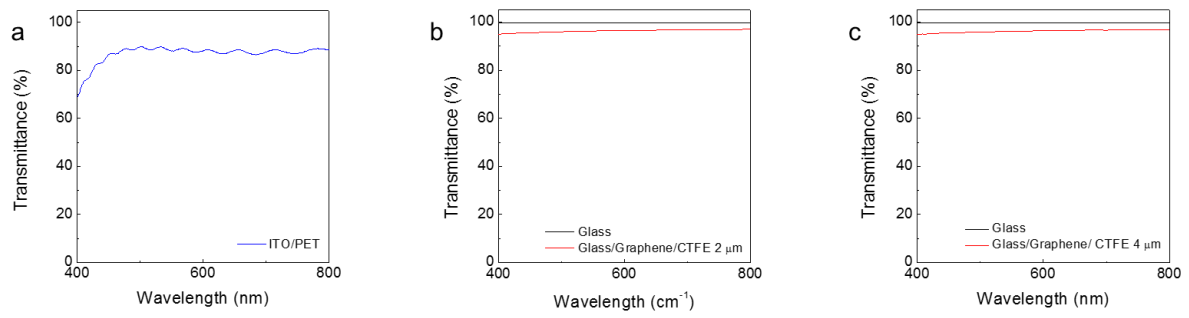

**Supplementary Figure S1.** Transmittance of the TENG; (a) the top ITO/PET electrode and (b) the P(VDF-TrFE-CTFE) layer on the bottom graphene electrode. (c) Transmittance of 4  $\mu\text{m}$ -thick CTFE layer on graphene.

**Supplementary Table S1.** Individual performance of QDSCs.

| Samples | $V_{oc}$ (V)    | $J_{sc}$ (mA/cm <sup>2</sup> ) | FF              | PCE (%)         |
|---------|-----------------|--------------------------------|-----------------|-----------------|
| 1       | 0.52            | 26.44                          | 0.59            | 8.11            |
| 2       | 0.50            | 25.75                          | 0.68            | 8.76            |
| 3       | 0.52            | 25.75                          | 0.62            | 8.30            |
| 4       | 0.50            | 25.92                          | 0.58            | 7.50            |
| 5       | 0.52            | 26.44                          | 0.57            | 7.83            |
| 6       | 0.50            | 26.02                          | 0.61            | 7.94            |
| Average | $0.51 \pm 0.01$ | $26.05 \pm 0.32$               | $0.61 \pm 0.04$ | $8.07 \pm 0.43$ |

**Supplementary Table S2.** Changes in power conversion efficiency of the 6-QDSCs before and after assembly of the TENG.

| Parameter                      | Before | After | $\Delta$ (After - Before) |
|--------------------------------|--------|-------|---------------------------|
| $V_{oc}$ (V)                   | 3.12   | 3.12  | 0                         |
| $J_{sc}$ (mA/cm <sup>2</sup> ) | 23.96  | 22.10 | -1.86                     |
| FF                             | 0.61   | 0.65  | 0.04                      |
| PCE                            | 7.60   | 7.47  | -0.13                     |

Due to series connection, an active area of 6-QDSCs is 6 times larger than that of a single cell and thus PCE of the 6-QDSCs is calculated by using an equation below:

$$V_{oc} \times J_{sc} \times FF / 6 \text{ (number of cells)}$$

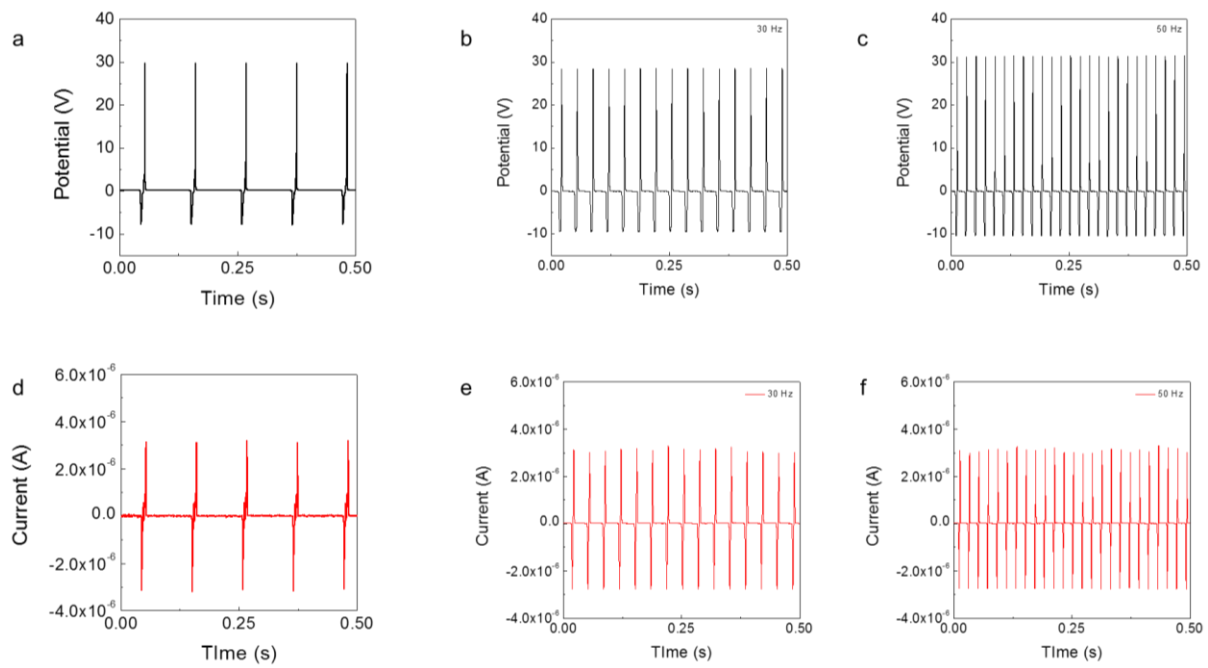

**Supplementary Figure S2.** Potential and current output of the TENG without rectification at the frequency of (a) and (d) 10 Hz, (b) and (e) 30 Hz, and (c) and (f) 50 Hz, respectively.

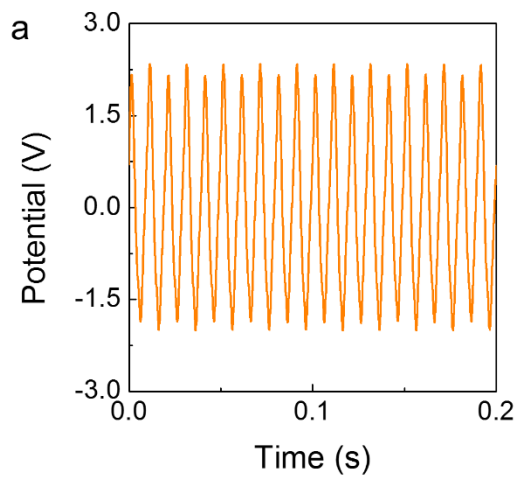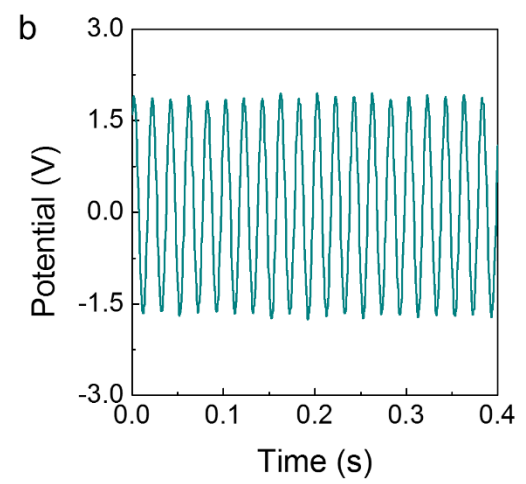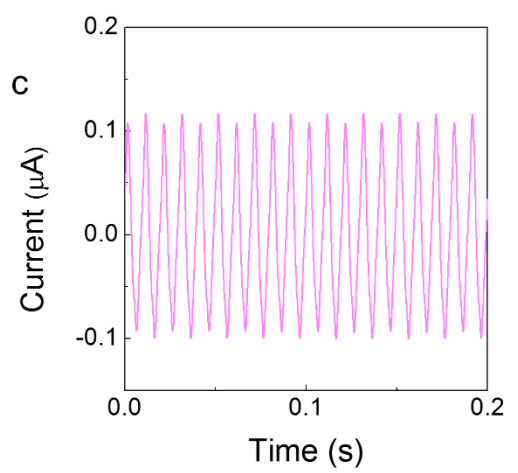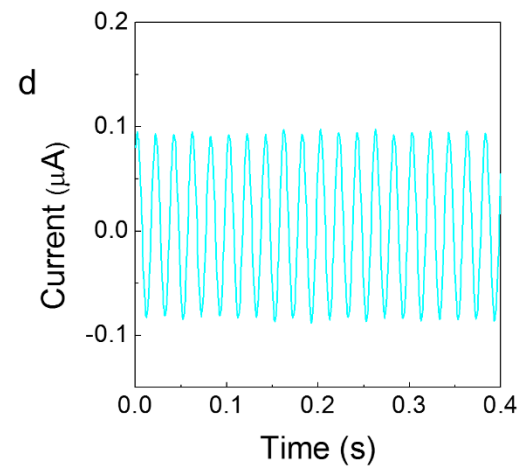

**Supplementary Figure S3.** Potential and current output of the TENG which was driven by environmental energy sources; (a) and (c) sound, and (b) and (b) wind, respectively.

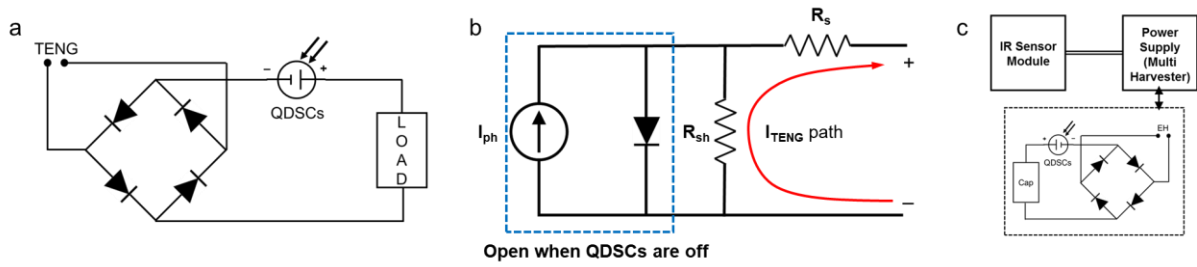

**Supplementary Figure S4.** (a) Schematics of a power management circuit for the HEH to obtain a hybrid signal. (b) An equivalent circuit of a solar cell and current path (Red curve) of the TENG ( $I_{TENG}$ ). (c) The schematics of a sensor module connected with the power management circuit.

**Supplementary Video S1.** Operating LEDs at the conditions of charging capacitors and opening the relay switch for 0.2 seconds.

**Supplementary Video S2.** Operating LEDs at the continuous mode.

**Supplementary Video S3.** Operating the IR sensor without aid of any external power supply.
